# Supplementary material
Source: Hindawi journal article supplement (doi:10.1155/2011/924782)

Supplementary Figure 1:

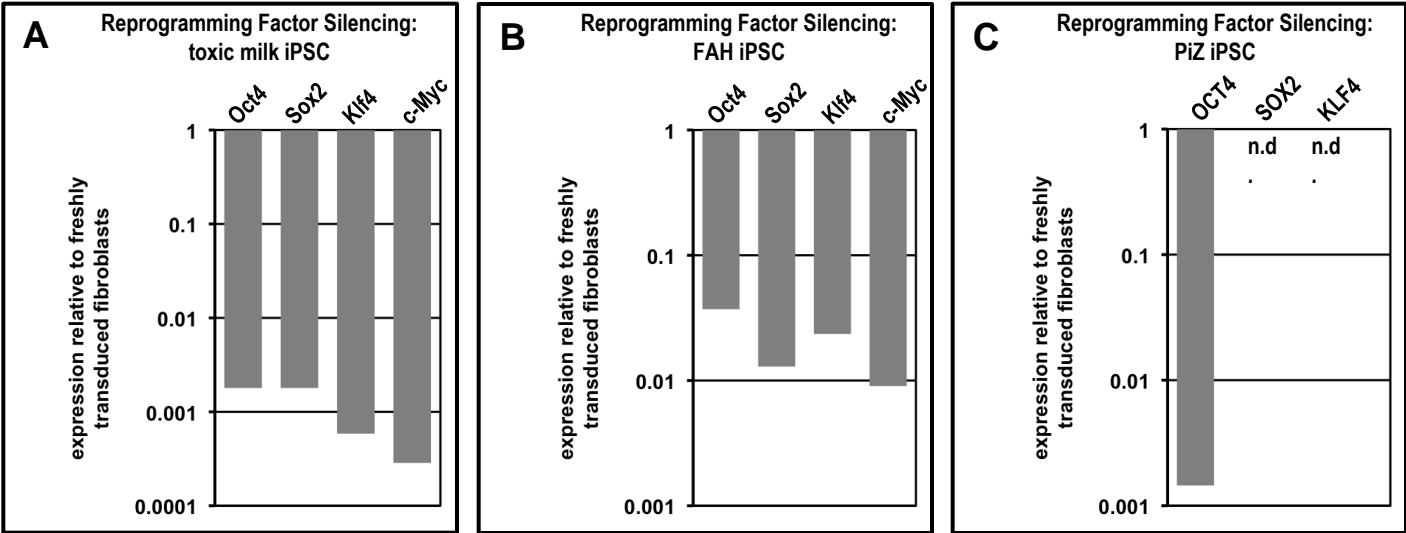

Supplement: f1 [file 924782.f1.pdf]
